# Supplementary material
Source: PubMed Central journal article supplement (PMC1692427)
Supplement: R7HYXFQJVAK3BHVD_353_2077s01.pdf [file R7HYXFQJVAK3BHVD_353_2077s01.pdf]

0001000000002001010000100000010001001000100021200000100001000000000000210000000  
01100010100010000010000100020000011000000002000010000010000101000000000000010200  
10020000100011000110202000010000110011010100110000001010000110010001000000000001  
00000011000100011000000010000001211000000100110001?1100000001

'Nesoclopeus\*'

1000000000000000100000100000000000000000000000000000010100000000000010100101001?1011000  
00010??0?00021010????????????????????????????????????????????????????????????100??10?????00?0000210000000  
0110001010001??????00001000200000110000????????????????????????????????????????000000000000010200  
1002000010001100011????????????????????????????????????????????????????????????????????????????001  
0000001100?100011000000010000001211000000????????????????????00000?

'Habropteryx\*'

1000000000000000100000100000000000000000000000000000010100000000000010100?01001?1011000  
00010??0?00????????????????????????????????????????????????????????????????????????????????  
????????????????????????????????????????????????????????????????????????????????????001010000000000000010200  
1002000010001100011?????????????????????????????????????????????????????????????????????????????01  
0000001000?1000110000000100000012110000001001100014110?000001

'Rallus\*'

20000000000000001000001100000000000000000000000000001010000000000001010010100101011000  
00010000000020110100001000000100010010001000212000001000011000000100000211000000  
00100010110010000010000100020000011000000002000000000010000101000000000000010200  
10020000100011000110202000010000110011010100110000001010000110010001000000000001  
0000001100010001100000001000000121100000010011000141100000001

'Hypo. torq.-okin.\*'

20000000000000001000001100000000000000000000000000001010000000000001010010100101011000  
00010000000020010100001000000100010010001000212000001000011000000100000210000000  
00100010110010000010000100020000011000000002000000000010000101000000000000010200  
10020000100011000110202000010000110011010100110000001010000110010001000000000001  
000000110001000110000000100000012110000001001100014110?000001

'Hypo. other\*'

20000000000000001000001100000000000000000000000000001010000000000001010010100101011000  
00010000000020010100001000000100010010001000212000001000011000000100000211000000  
0(01)1000101(01)00100000100001000200000110000000020000(01)0000010000101000000000  
00001020010020000100011000110202000010000110011010100110000001010000110010001000  
0000000010000001100010001100000001000000121100000010011000141100000001

'Gallirallus\*'

20000000000000001000001100000000000000000000000000001010000000000001010010100101011000  
0001000000002(01)010100001000000100010010001000212000001000011000000100000210000  
00001100010100010000010000100020000011000000002000010000010000101000000000000010  
2001002000010001100011020200001000011001101010011000000101000011001000100000000  
0010000001100010001100000001000000121100000010011000141100000001

'Cabalus\*'

200000030000000210000012000000000000000000000000000001010000000000001010010100101011000  
0001000000????????????????????0000001000100?000100021?000001000010000000000000210000000  
01100010100010000010000100020000011000000002000010000010000101000000000000010200  
1002000010001100??0202000010000110011010100110000001010000110010001000000000001  
00000011000100011000000010000001211000000?001100014110?000001

'Capellirallus\*'

2000000300000002100000121000000000000000000000000000001010000000000001010010100101011000  
0001000000????????????????????0000001000100?000100021?000001000010000000000000210000000  
01100????000100000100001000200000010000000020?00100000100001010000000000000010200  
1002000010001100??0202000010000110011010100110000001010000?10010001000000000001  
00000011000100011000000010000001211000000????????????????????





10020000100011000110202000010000110011010100110000001010000110000001000000000001  
0000001100010001100000001000000121100000010011000141100000001

'Atlantisia\*'

100000000000000010000010000000000000000000000101000000000001010010100101011000  
000100000000200101000010000001000000100010002130000010000100000000000021000000  
0110001010001000001000010002000001100000000200001000001000010100000000000010200  
10020000100011000110202000010000110011010100110000001010000110000001000000000001  
0000001100010001100000001000000121100000010011000141100000001

Crex

10000000000000001000001000000000000000000000001000000000001010010100101011000  
0001000000002001010000100000010001001000100021200000100001100000000000211000000  
0010001011001000001000010002000001100000000200000000001000010100000000000010200  
10020000100011000110202000010000110011010100110000001010000110010001000000000001  
0000001100010001100000001000000121100000010011000141100000001

Laterallus

10000000000000001000001000000000000000000000001000000000001010010100101011002  
0001000000002001010000100000010001001000100021300000100001100000000000210000000  
0010001011001000001000010002000001100000000200000000001000010100000000000010200  
10020000100011000110202000010000110011010100110000001010000110010001000000000001  
000000110001000110000000100000012110000001001100014110000000 (01)

'Porzana\*'

100000000000000010000010000000000000000000000 (01) 000010000000000001010010100101011  
00 (02) 0001000000002001010000100000010001001000100021200000100001 (01) 000000000000  
2100000000 (01) 1000101 (01) 0010000010000100020000011000000002000000000010000101000  
00000000000102001002000010001100011020200001000011 (01) 011010100110000001010000110  
0100010000000000010000001100010001100000001000000121100000010011000141100000 (01)  
01

Neocrex

100000000000000010000010000000000000000000000100001000000000001010010100101011000  
00010?????0????????????????????????????001000100021?00000100001100000000000210000000  
00100010110010000010000100020000011000000002000000000010000101000000000000010200  
10020000100011000110202000010000110011010100110000001010000110010001000000000001  
0000001100?1000110000000100000012110000001????????????????000000

'Amaurornis\*'

1000000000000000100000100000001000000000000100001000000000001010010100101011000  
0001000000002001010000100000010001001000100021200000101001100000000000210000000  
00100010110010000010000100020000011000000002000000000010000101000000000000010200  
10020000100011000110202000010000111011010100111000001010000110010001000000000001  
000000110001000110000000100000012110000001001100014110000000 (01)

Gallicrex

1000000000000000100000100000001000000000000100001000000000001010010100101011000  
0001000000002001010000100000010001001000100021200000101001100000000000210000000  
00100010110010000010000100020000011000000002000000000010000101000000000000010200  
10020000100011000110102000010000111011010100111000001010000110010001000000000001  
0000001100010001000000001000000121100000010011000141100000101

Porphyriops

1000000000000000100000100000001000000000000100001000000000001010010100101011002  
00010000000020010100001000000100010010001000212000001010011000001000000210000000  
00100010110010000010000100020000011000000002000000000010000101000000000000010200  
10020000100011000110102000010000111011010100111000001010000110010001000000000001  
000000110001000100000000100000012110010001001100014110?000001

'Gallinula\*'

1000000000000000100000100000001000000000000100001000000000001010010110101011000

00010000000020010100001000000100010010001000212000001010011000001000000210000000  
0010001011001000001000010002000001100000000200000000001000010100000000000010200  
1002000010001100011010200001000011101101010011100000101000011001000100000000001  
0000001100010001000000001000000121100100011011001141100000001

'Porphyriornis\*'

10000000000000001000001000000010000000000001000010000000000001010010110101011000  
00010000000020010100001000000100010010001000212000001010010000001000000210000000  
0110001011001000001000010002000001100000000200000000001000010100000000000010200  
1002000010001100011010200001000011101101010011100000101000011001000100000000001  
000000110001000100000000100000012110010001001100014110000000?

'Tribonyx\*'

10000000000000001000001000000010000000000001000010000000000001010010110101011000  
0001000000002001010000100000010001001000100021200000101001(01)000001000000210000  
0000(01)1000101(01)0010000010000100020000011000000002000000000010000101000000000  
00001020010020000100011000110102000010000111011010100111000001010000110010001000  
0000000010000001100010001000000001000000121100000010011000141100000001

'Fulica\*'

100000000000000010000010000000100000000000010000100000000000010100101(12)0(12)01  
011000000100000000200111000010000001000(12)00100110013130000010100(01)0000001000  
00021000000000100010110010000010000100020000011000000002000000000011000101000000  
000000010200(01)0020000100011000110102000010000121011010100111000001010010110010  
0010011000100010000001100010001000000101000000121100100010111103141100000001

;

END;

BEGIN SETS;

CHARSET OSTEOLGICAL = 1-105 108-112 114-361;

CHARSET MYOLINTEG = 362-381;

END;

BEGIN ASSUMPTIONS;

OPTIONS DEFTYPE=unord PolyTcount=MINSTEPS ;

TYPESET \* STANDARD = unord: 1-92 97-101 104-109 111-113 115-119 121-124  
126 128-151 153-156 158-203 205-240 242-262 264-273 275-315 317-352 354 356-358  
360-381, ord: 93-96 102-103 110 114 120 125 127 152 157 204 241 263 274 316 353  
355 359;

EXSET FLTLESS = 139 162 170 209;

END;

BEGIN PAUP;

CONSTRAINT GRUFJACA = ((5-76));

CONSTRAINT GRUIFORM = ((6-76));

CONSTRAINT TURNICES = ((6-8));

CONSTRAINT TURNICID = ((7-8));

CONSTRAINT EXTURN = ((9-76));

CONSTRAINT EXTUOTD = ((10-76));

CONSTRAINT MESITOR = ((10-11));

CONSTRAINT EXMETU = ((12-76));

```
CONSTRAINT CARIAM = ((12-14));
CONSTRAINT CARIAMD = ((12-13));
CONSTRAINT EUGRRAL = ((15-76));
CONSTRAINT EURYPY = ((15-18));
CONSTRAINT EURMES = ((15-16));
CONSTRAINT RHYNOC = ((17-18));
CONSTRAINT GRURAL = ((19-76));
CONSTRAINT GRUES = ((19-25));
CONSTRAINT GRUIOD = ((20-25));
CONSTRAINT GRUIDAE = ((21-25));
CONSTRAINT GRUINAE = ((22-25));
CONSTRAINT GRUINI = ((23-25));
CONSTRAINT RALLI = ((26-76));
CONSTRAINT HELIO = ((26-28));
CONSTRAINT HELPOD = ((26, 28));
CONSTRAINT RALLOI = ((29-76));
CONSTRAINT RALLID = ((30-76));
CONSTRAINT HOUDE = ((18, 29-76));
```

END;

BEGIN MacClade;

```
Version 4.0 75;
LastModified -1214697538;
FileSettings editor '0' '0' '1' '1';
Singles 100;
Editor 00011001111111000100 '0' '24' Geneva '9' '100' '1' all;
EditorPosition '40' '4' '915' '1275';
TreeWindowPosition '40' '2' '920' '1274';
ListWindow Characters closed Geneva '9' '50' '10' '265' '359' 00;
ListWindow Taxa closed Geneva '9' '50' '10' '276' '490' 100;
ListWindow Trees closed Geneva '9' '50' '10' '276' '490' ;
ListWindow TypeSets closed Geneva '9' '50' '10' '276' '490' ;
ListWindow WtSets closed Geneva '9' '50' '10' '276' '490' ;
ListWindow ExSets closed Geneva '9' '50' '10' '276' '490' ;
ListWindow CharSets closed Geneva '9' '50' '10' '276' '490' ;
ListWindow TaxSets closed Geneva '9' '50' '10' '276' '490' ;
ListWindow NexusBlocks closed Geneva '9' '50' '10' '276' '490' ;
ChartWindowPosition '50' '30' '880' '1220';
StateNamesSymbols closed Geneva '9' '10' '50' '30' '148' '220';
WindowOrder Data;
OtherSymbols &/ 00 ?-;
Correlation '0' '0' '1000' '0' '0' 10011010;
Salmo 00000001;
EditorFile '2';
ExportHTML _ MOSS '100' 110000;
PrettyPrint 10;
EditorToolsPosition '797' '44' '115' '165';
TreeWindowProgram 10;
TreeWindow 0000;
Continuous '0' '3' 1;
Calculations 00000001;
SummaryMode '0' '0' 0;
```

```

Charts Geneva '9' (normal) 0010;
NexusOptions '0' '0' '50' 001011001;
TipLabel '1';
TreeFont Geneva '9' (normal);
TreeShape 1.0 1.0 0100;
TraceLabels 0101;
ChartColors '0' '0' '-1' '9' 11;
ChartBiggestSpot 1;
ChartPercent 10;
ChartBarWidth '10' 1;
ChartVerticalAxis 10101;
ChartMinMax '0';
TraceAllChangesDisplay '1' 1;
BarsOnBranchesDisplay '0' '0' '-5536' '10000' '10000' '10000' '10000' '-
5536' '-536' '-536' '-536' '6' '1' 0000101;
ContinuousBranchLabels 0;
AllStatesBranchLabels 1;
IndexNotation '2' 1;
PrintTree 10.00 '2' '2' '2' '2' '8' '2' '2' '2' '2' '2' '2' Geneva '9'
(normal) Geneva '10' (italic ) Geneva '9' (normal) Geneva '9' (normal) Geneva
'9' (bold ) Geneva '9' (normal) Geneva '9' (normal) '83' '115' '13' '45' '116'
'148' '13' '45' '149' '181' '13' '45' '182' '214' '13' '45' '140' '52' '0' '0'
'457' '610' '468' '35' '510' '35' '510' '365' '24' '35' '1' '1' '1' '1' '20302'
'22' '-39' '4' '-40' '0' '1' '2' '1' '8' '34' '34' '0' '2'
0100110000000001010100000111000;
MatchChar 00 .;
EntryInterpretation 01;
ColorOptions 0;
TreeTools '0' '5' '4' '0' '10' '4' '0' 00100111111101110;
EditorTools '0' '0' '0' '1000' '0' '0' '6' '3' 000001011100001;
PairAlign '2' '2' '3' '2' '1' '1' '2' '1' '3' 1010;
BothTools '1';
END;

```



100010100010010000001101131000110010100110101001000001000100000000000010000000  
00110000000001000000000000000000000000000000000000011?????????????00101000000000000000  
0000000000000000000000000000000000000000000000000000000000000000000000000000000000000001000100  
00000000010000000000000000000000000000000010101000010000100001000000000000000000010000  
0000140000000

Ar. \_guarauna

0000000311000001010000000000000210000000001000100000000000000010000100101011000  
0001001010002111010010310010011002110001000001101001110010111000001100?30?010000  
01100000101000000110000110121000001101001100010001100000010100100000000000001000  
010000000011000011001131001100010100110101001000000001000000000000000000000000000000001  
10010000000100000000000000000000110000000001001101000100000000010000000000000000  
00000000000000000000000000000000000000000000000000000000000000000000000000000000000  
00000000000000000000000000000000002010000000010100101000000000000000000000000000  
0010000010

Ba. \_pavonina

0000000110000000010000000000000210001000001000000000000001000010001100101011000  
0001001010002111010000410010011002110001000001101001110010111000001100?30?110000  
01100000101000000110000110121010001101001100010001100000010100110000000001001000  
010000000011000010001121001100010100110101001000000000100000000000000000000000000001  
100110000001000000000100000000011000000000100110100210000000002000000000000000000  
0000001000000000000000000000000000000000000000000000000000000000100000000010100011000010000  
00000020000000000000000000000000000000001020100001000011200100000000001000000200001  
0210000000

Ba. \_regulorum

0000000110000000010000000000000210001000001000000000000001000010001100101011000  
0001001010002111010000410010011002110001000001101001110010111000001100?30?110000  
01100000101000000110000110121010001101001100010001100000010100110000000001001000  
0100000000110000100011210011000101001101010010000000001000000000000000000000000001  
1001100000010000000001000000000110000000001001101002100?000000200000000000000000  
00000010000000000000000000000000000000000000000000000000000000000000000000000000000  
00000020000000000000000000000000000000001020100001000011200100000000001000000200001  
?210000000

Bu. \_carunculatus

0000000110000000010000000001000210000000001000100000000001000010000100101011000  
0001001010002211010001410010011002110002000001101001110010111000001100?30?111100  
01100001101101000110000110121110001201001100010001100000010100110000000001001000  
010000000001000010001121001100010100110101001000000000100000000000000000000000000000001  
1001100000010000000001000000000112000000001001101002100?000000100000000100000000  
000010010000000000000001000000000000002000000000000000000020000001010010000  
0000004000000000000000000000000000002010000100001020020000000000000000000000300000  
?010000000

Le. \_leucogermanus

0000000110000000010000000001000210000000001000100000000001000010000100101011000  
0001001010001211010001410010011002110002000001101001110010111000001100?40?111100  
01100001101101000110000110121110001201001100010001100000010100110000000001001000  
0100000000010000100011210011000101001101010010000000001000000000000000000000000001  
1001100000010000000001000000000112000000001001101002100?000001100000000000000000  
000000001000000000000001000000000000000300000000000000000000000000000002000010000  
00000040000000000000000000000000000020100003000010200200100000000000000000200000  
0030000000

An. \_paradisea

0000000110000000010000000001000210000000001000100000000001000010000100101011000  
0001001010001211010001410010011002110001000001101001110010111000001100?40?112100

01100001101101000110000110121110001201001100010001100000010100110000000001001000  
01000000000100001000112100110001010011010100100000000010000000000000000000000001  
1001100000010000000010000000001120000000010011010031000000000100000000000000000  
00000100000000000000000000000000000000000000000000000000000000000000000000000011000010000  
00000020000000000000000000000000000000000000201000010000102002000000000000000000300000  
0010000000

An.\_virgo

0000000110000000010000000001000210000000001000100000000001000010000100101011000  
0001001010001211010002410010011002110001000001101001110010111000001100?40?112100  
01100001101101000110000110121110001201001100010001100000010100110000000001001000  
01000000000100001000112100110001010011010100100000000010000000000000000000000001  
100110000001000000001000000000112000000001001101003100?000000100000000000000000  
000001000000000000000000000000000000000000020000000000010000000000000011000010000  
0000003000000000000000000000000000000000000020100001000010200200000000000000000300000  
0010000000

Gr.\_vipio

0000000110000000010000000001000210000000001000100000000001000010000100101011000  
0001001010001211010003410010011003110002000001101001110010111000001100?40?112110  
01100001101101000110000110121110001201001100010001100000010100110000000001001000  
01000000000100001000112100110001010011010100100000000010000000000000000000000001  
100110000001000000001000000000112000000001001101002100?000001000000000000000000  
0000000001000000000000001000000000000000002000000000001000000000000001000010000  
0000002000000000000000000000000000000000000201000010000102002001000000000000000300000  
0030000000

Gr.\_rubicundus

0000000110000000010000000001000210000000001000100000000001000010000100101011000  
00010010100?40?112110  
01100001101101000110000110121110001201001100010001100000010100110000000001001000  
01000000000100001000112100110001010011010100100000000010000000000000000000000001  
100110000001000000001000000000112000000001001101003100?000001000000000000000000  
0000000003000000000000000000000000000000000002000000000001000000000000001000010000  
0000002000000000000000000000000000000000000201000010000102002001000000000000000300000  
0010000000

Gr.\_antigone

0000000110000000010000000001000210000000001000100000000001000010000100101011000  
0001001010001211010003410010011003110002000001101001110010111000001100?40?112110  
01100001101101000110000110121110001201001100010001100000010100110000000001001000  
01000000000100001000112100110001010011010100100000000010000000000000000000000001  
10011000000100000000100000000011200000000100110100210000000011000000000000000000  
00000000030000000000000000000000000000000002000000000001000000000000001000010000  
0000002000000000000000000000000000000000000201000010000102002001000000000000000300000  
0030000000

Gr.\_canadensis

0000000110000000010000000001000210000000001000100000000001000010000100101011000  
0001001010001211010003410010011003110002000001101001110010111000001100?40?112110  
01100001101101000110000110121110001201001100010001100000010100110000000001001000  
01000000000100001000112100110001010011010100100000000010000000000000000000000001  
10011000000100000000100000000011200000000100110100210000000011000000000000000000  
0000000001000000000000000000000000000000002000000000000000000000000001000010000  
000000200000000000000000000000000000000000020100001000010200200000000000000000300000  
0010000000

Gr.\_grus

0000000110000000010000000001000210000000001000100000000001000010000100101011000

0001001010001211010003410010011003110002000001101001110010111000001100?40?112110  
01100001101101000110000110121110001201001100010001100000010100110000000001001000  
010000000001000010001121001100010100110101001000000001000000000000000000000000001  
100110000001000000001000000000112000000001001101002100?00000100000000000000000000  
000000001200000000000000000000000000000000020000000000000000010000001000010000  
00000020000000000000000000000000000000000020100001000010200200000000000000000300000  
0010000000

Gr. *nigricollis*

?0?????1????????????????????????????????????????????????????????????????????????  
????????????????????????????????????????????????????????????????????????????????  
????????????????????????????????????????????????????????????????????????????????  
????????????????????0????????????????????????????????????????????????????????????  
????????????????????????????????????????????0?????001101002100?000001000000000000000000  
00000000110000000000000000000000000000000003000100000000000000100000101000010000  
000000400000000000000000000000000000000201000010000102002001000000000000000300000  
0010000000

Gr. *japonensis*

0000000110000000010000000001000210000000001000100000000001000010000100101011000  
0001001010001211010003410010011003110002000001101001110010111000001100?40?112110  
01100001101101000110000110121110001201001100010001100000010100110000000001001000  
01000000000100001000112100110001010011010100100000000100000000000000000000000001  
100110000001000000001000000000112000000001001101002100?00000100000000000000000000  
000000001100000000000000000000000000000000030000000000000000000100000102000010000  
000000400000000000000000000000000000000201000030000102002002000000000000000200000  
0010000000

Gr. *americana*

0000000110000000010000000001000210000000001000100000000001000010000100101011000  
0001001010001211010003410010011003110002000001101001110010111000001100?40?112110  
01100001101101000110000110121110001201001100010001100000010100110000000001001000  
01000000000100001000112100110001010011010100100000000100000000000000000000000001  
100110000001000000001000000000112000000001001101002100?00000100000000000000000000  
0000000011000000000000000000000000000000000300000000000000000000000002000010000  
000000400000000000000000000000000000000201000030000102002001000000000000000200000  
0010000000

Gr. *monachus*

0000000110000000010000000001000210000000001000100000000001000010000100101011000  
0001001010001211010003410010011003110002000001101001110010111000001100?40?112110  
01100001101101000110000110121110001201001100010001100000010100110000000001001000  
01000000000100001000112100110001010011010100100000000100000000000000000000000001  
100110000001000000001000000000112000000001001101002100?00000100000000000000000000  
0000000001000000000000000000000000000000000300000000000000000000000001000010000  
000000200000000000000000000000000000000201000010000102002000000000000000000000000  
0010000000

Ho. *fulica*

10000000000000000100000000000000000000000000000000000000000000000000000000000000  
000100000000210101000020000001000100000000021201000100001000000001000310000001  
00100000000010000010001100021000001000000002010000000010020101000000000000010200  
100200001001110001111100001000011111001011110000100011100000000101000100120001  
000000100000010001000000010001011120000001?????????????0010211000000000000000000000  
00000000000000000001000000000000000000000000100000000000000000000000000000000000  
00000040000000000000000000000000000000031000000001100000100000000000000000000000  
0000110010

























????????????????????????????????????????????????????????????0????????????????????????????00000110000010000000000000  
000100000010000000000000000000001100000100000000000000000000000002000000000001000000  
00000020000000000010000000000000101000201000000000000001000000000100000000020010  
0120000000

R.\_antarcticus

?0?????0????????????????????????????????????????????????????????1????????????????????????????????????  
????????????????????????????????????????????????????????????????????????????????????????????????  
????????????????????????????????????????????????????????????????????????????????????????????????  
?????????????????????0????????????????????????????????????????????????????????????????????????  
????????????????????????????????????????????????????????0????????????????????????????0000011000001000000000000  
0001000000100000000000000000001100000100000000000000000002000000000001000000  
0000002000000000001000000000000010100020100000000000001000000000100000000020010  
0120000000

R.\_limicola

200000000000000010000011000000000000000000000000001010000000000001010010100101011000  
00010000000020110100001000000100010010001000212000001000011000000100000211000000  
00100010110010000010000100020000011000000002000000000010000101000000000000010200  
1002000010001100011020200001000011001101010011000000101000011001000100000000001  
00000011000100011000000010000001211000000100110101411000000011000001000000000000  
0001000000100000000000000000000011000001000000000000000000002000000000001000000  
000000800000000000100000000000000010002010000000000000100000000010000000020010  
0120000000

'R.\_sublimicola\*'

20000?00000????????????????????????????????????????????0??1????????????????????????????????????  
????????????????????????????????????????0000001000?00?000100021?0000010?0011000000100000211000000  
01100?????????0000010000100020000011000000002000000000010000101000000000000010200  
100200001000110?????020200001000011001101010011000000101000??1001000100000000001  
00000011000100011000000010000001211000000????????????????????????????????????????????  
????????????????????????????????????????????????????????????????????????????????????????  
????????????????????????????????????????????????????????????????????????????????????????  
?????????????

R.\_longirostris

200000000000000010000011000000000000000000000000001010000000000001010010100101011000  
000100000000?????100001000000100010010001000212000001000011000000100000211000000  
00100010110010000010000100020000011000000002000000000010000101000000000000010200  
1002000010001100011020200001000011001101010011000000101000011001000100000000001  
00000011000100011000000010000001211000000100110101411000000011000001000000000000  
0001000000100000000000000000000011000001000000000000000000002000000000001000000  
0000008000000000001000000000000000100020100000000000001000000000000000020010  
0120000000

'R.\_sublongirostris\*'

20000?00000????????????????????????????????????????????0??1????????????????????????????????????  
????????????????????????????????????????0000001000?00?000100021?0000010?0011000000100000211000000  
01100010110010000010000100020000011000000002000000000010000101000000000000010200  
100200001000110?????020200001000011001101010011000000101000??1001000100000000001  
00000011000100011000000010000001211000000????????????????????????????????????????????  
????????????????????????????????????????????????????????????????????????????????????????  
????????????????????????????????????????????????????????????????????????????????????????  
?????????????

R.\_elegans

200000000000000010000011000000000000000000000000001010000000000001010010100101011000  
00010000000020110100001000000100010010001000212000001000011000000100000211000000  
00100010110010000010000100020000011000000002000000000010000101000000000000010200



????????????????????????????????????????????????????????????????????????????????????????????  
????????????????????0????????????????????????????????????????????????????????????????????????  
????????????????????????????????????????????????????????0????????????????????????????000001100000100000000000  
00010000001000000000000000000000110000100100200000000000000002000100000002000020  
00000020000000100010010000002000001000201000101000000001000030000000010000020010  
0120000000

H.\_assimilis

200000000000000010000011000000000000000000000101000000000001010010100101011000  
00010000000?????100001000000100010010001000212000001000011000000100000211000000  
0010001011001000001000010002000001100000000200000000001000010100000000000010200  
1002000010001100011020200001000011001101010011000000101000011001000100000000001  
000000110001000110000000100000012110000001001101014110?000001100000100000000000  
0001000000100000000000000000000011000010010020000000000000000020001000000002000030  
00000020000000100010000000001000001000201000101000000001000030000000010000020010  
0120000000

H.\_macquariensis

?0?????0????????????????????????????????????????????????????????????????????????????????  
????????????????????????????????????????????????????????????????????????????????????????  
????????????????????????????????????????????????????????????????????????????????????????  
????????????????????0????????????????????????????????????????????????????????????????????  
????????????????????????????????????????????????????????0????????????????????????000001100000100000000000  
00010000001000000000000000000011000010010020000000000000000020001000000002000030  
00000020000000200010000000001000001000201000101000000001000030000000010000020010  
0120000000

'H.\_dieffenbachii\*'

20000000000000001000001100000000000000000000001010000000000001010010100101011000  
00010000000?????????????0000001000?001000100021?000001000011000000100000211000000  
01100010100010000010000100020000011000000002000010000010000101000000000000010200  
10020000100011000110202000010000110011010100110000001010000110010001000000000001  
00000011000100011000000010000001211000000?????????????000001100000000000000000  
00010000000000000000000000000011000010010020000000000000000020001000000000000010  
00000000000000300010000000002000001000201000101000000001000030000000010000020010  
0120000000

'H.\_rovianae\*'

?0?????0????????????????????????????????????????????????????????????????????????????????  
????????????????????????????????????????????????????????????????????????????????????????  
????????????????????????????????????????????????????????????????????????????????????????  
????????????????????0????????????????????????????????????????????????????????????????????  
????????????????????????????????????????????????????????0????????????????????????000001100000?00000000000  
0001000000010000000000000000000010000100100?000000000000000002000100000000000000  
00000000000000100010000000000000001000201000100000000001000020000000010000020010  
01?0000000

'H.\_owstoni\*'

20000000000000001000001100000000000000000?0001010000000000001010010100101011000  
0001000000020010100001000000100010010001000212000001000011000000100000211000000  
0110001010001000001000010002000001100000000200000000001000010100000000000010200  
10020000100011000110202000010000110011010100110000001010000110010001000000000001  
000000110001000110000000100000012110000001001101014110000000110000000000000000  
00010000000000000000000000000000100001001002000000000000000002000100000000000000  
00000020000000100010000000000000001000201000101000000000000200000000010000020010  
0120000000

'H.\_wakensis\*'

20000000000000001000001100000000000000000000001010000000000001010010100101011000

000100000000??010100001000000100010010001000212000001000011000000100000211000000  
01100010100010000010000100020000011000000002000010000010000101000000000000010200  
10020000100011000110202000010000110011010100110000001010000110010001000000000001  
0000001100010001100000001000000121100000010011010141100000001100000000000000000  
0001000000000000000000000000000011000100100200000000000000002000100000000000000  
00000000000000100010000000000000001000201000100000000000000020000000000000020010  
0120000000

H.\_striatus

200000000000000010000011000000000000000000001010000000000001010010100101011000  
00010000000020010100001000000100010010001000212000001000011000000100000211000000  
00100010110010000010000100020000011000000002000000000010000101000000000000010200  
10020000100011000110202000010000110011010100110000001010000110010001000000000001  
000000110001000110000000100000012110000001001101014110?0000011000001000000000000  
00010000001100000000000000000000100000000002000000000000000020001000000001000010  
0000002000000000001001000000100000100020100010100000000100002000000010000020010  
0120000000

H.\_pectoralis

200000000000000010000011000000000000000000001010000000000001010010100101011000  
000100000000?????100001000000100010010001000212000001000011000000100000211000000  
00100010110010000010000100020000011000000002000000000010000101000000000000010200  
10020000100011000110202000010000110011010100110000001010000110010001000000000001  
000000110001000110000000100000012110000001001101014110?0000011000001000000000000  
00010000001100000000000000000000100000000002000000000000000020001000000001000010  
0000002000000000001000000000100000100020100000000000000100000000000010000020010  
0120000000

H.\_muelleri

?0?????0????????????????????????????????????????????????????????????????????????  
????????????????????????????????????????????????????????????????????????????????  
00100????????????????????????????????????????????????????????????????????????????  
????????????????????????????????????????????????????????????????????????????????  
????????????????????????????????????????????????????????????????????????????????  
000100000011000000000000000000001000000000000000000000000000000020001000000001000000  
0000002000000000001000000000000000100020100000000000000100000000000010000020010  
0120000000

H.\_mirificus

?0?????0????????????????????????????????????????????????????????????????????????  
????????????????????????????????????????????????????????????????????????????????  
????????????????????????????????????????????????????????????????????????????????  
????????????????????????????????????????????????????????????????????????????????  
????????????????????????????????????????????????????????????????????????????????  
0001000000110000000000000000000010000000000200000000000000002000100000000000010  
0000002000000000001000000000100000100020100000000000000100000000000010000020010  
0120000000

'S.\_sharpei\*'

?0?????0????????????????????????????????????????????????????????????????????????  
????????????????????????????????????????????????????????????????????????????????  
????????????????????????????????????????????????????????????????????????????????  
????????????????????????????????????????????????????????????????????????????????  
????????????????????????????????????????????????????????????????????????????????  
00010000001000000000000000000000?1000000000?0000000000000000000000000000000000  
00000020000000000010000000001000001000201000100000000001000030000000010000020010  
0130000000

'G.\_australis\*'

20000000000000000100000110000000000000000000001010000000000001010010100101011000  
0001000000002(01)010100001000000100010010001000212000001000011000000100000210000  
0000110001010001000001000010002000001100000000200001000001000010100000000000010  
2001002000010001100011020200001000011001101010011000000101000011001000100000000  
0010000001100010001100000001000000121100000010011010141100000001100000000000000  
0000001000000100000000000000000000100000001002010000000000000000001000000001000  
00000000200000002000100000000000000001000200000101000000001000030000000010000020  
0101130000000

'G.\_greyi\*'

20000000000000000100000110000000000000000000001010000000000001010010100101011000  
00010000000?????100001000000100010010001000212000001000011000000100000210000000  
01100010100010000010000100020000011000000002000010000010000101000000000000010200  
1002000010001100011020200001000011001101010011000000101000011001000100000000001  
000000110001000110000000100000012110000001001101014110?000001100000000000000000  
0001000000100000000000000000000000100000001002010000000000000000001000000001000000  
000000200000002000100000000000000001000200000101000000001000030000000010000020010  
1120000000

'C.\_modestus\*'

200000030000000210000012000000000000000000000001010000000000001010010100101011000  
0001000000?????????????0000001000100?000100021?000001000010000000100000210000000  
01100010100010000010000100020000011000000002000010000010000101000000000000010200  
1002000010001100???0202000010000110011010100110000001010000110010001000000000001  
00000011000100011000000010000001211000000?001101014110?000001100000000000000000  
000100000000000000000000000000000000000000000000000000000000000000000000000000  
00000000000000000004000000000000000100010100010100000000000020000000010000020010  
0020000000

'C.\_karamu\*'

20000003000000021000001210000000000000??0000001010000000000001010010100101011000  
0001000000?????????????0000001000100?000100021?000001000010000000100000210000000  
01100??000100000100001000200000010000000020?00100000100001010000000000000010200  
1002000010001100??0202000010000110011010100110000001010000?10010001000000000001  
00000011000100011000000010000001211000000???????????????????????????????????????  
?????????????????????????????????????????????????????????????????????????????????  
?????????????????????????????????????????????????????????????????????????????????  
????????????

'H.\_insignis\*'

1000000000000000010000010000000000000000000000010100000000000010100?01001?1011000  
000100?0?00????????????????????????????????????????????????????????????????????????  
?????????????????????????????????????????????????????????????????????????????????  
00000010001100011?????????????????????????????????????????????????????????????????01  
0000001000?100011000000010000001211000000????????????????000001200000000000000000  
0001000000000001000000000000000000000002000000000000100000000000000000000000  
00000050000000000004000000000000000100020100000000000001000020000000010000120010  
0130000000

'H.\_okinawae\*'

20?????0????????????????????????????????????????????????????????????????1????????????  
?????????????020010????????????????????????????????????????????????????????????10001000000010000021000000  
0110001011001000001000010002000001?0000????????????????????????????????????????????  
?????????????????0????????????????????????????????????????????????????????????????  
????????????????????????????????????????????????????????0?????001101014110?000001300000000000000000  
00010000000000000000000000010000000000112000000000000200000000000000000000000

00000050000000100040000000000000001000?01000000000000001000020000000010000120010  
0130000000

H.\_torquatus

2000000000000000100000110000000000000000000101000000000001010010100101011000  
00010000000020010100001000000100010010001000212000001000011000000100000210000000  
0010001011001000001000010002000001100000000200000000001000010100000000000010200  
10020000100011000110202000010000110011010100110000001010000110010001000000000001  
000000110001000110000000100000012110000001?????????????000001200000000000000000  
000100000000000000000000000000000000000011200000000000000000000000000000000000  
0000005000000020004000000000000000100020100000000000001000020000000010000120010  
0120000000

H.\_sulcirostris

?0?????0????????????????????????????????????????????????????????????????????????  
????????????????????????????????????????????????????????????????????????????????  
????????????????????????????????????????????????????????????????????????????????  
?????????????????????0????????????????????????????????????????????????????????????  
????????????????????????????????????????????????????????????????????????????????  
000100000000000000000000000000000000000011200000000000000000000000000000000000  
0000005000000010004000000000000000100020100000000000001000020000000010000120010  
0120000000

H.\_celebensis

2000000000000000100000110000000000000000000101000000000001010010100101011000  
0001000000?????100001000000100010010001000212000001000011000000100000210000000  
0010001011001000001000010002000001100000000200000000001000010100000000000010200  
10020000100011000110202000010000110011010100110000001010000110010001000000000001  
000000110001000110000000100000012110000001001101014110?000001200000000000000000  
000100000000000000000000000000000000000011200000000000020000000000000000000000  
0000005000000000004000000000000000100020100000000000001000020000000010000120010  
0120000000

'A.\_bonasia\*'

10000003000000021000001000000000000000000000000101000000?????????0010100101011000  
0001000000?????????????????00000010001001000100021?00000100001000000000000210000000  
0110001010001000001000010002000001100000000200001000001000010100000000000010200  
1002000010001100011020200001000011001101010011000000101000??100100010000?0000001  
00000011000100011000000010000001211000000????????????????????????????????????????  
????????????????????????????????????????????????????????????????????????????????  
????????????????????????????????????????????????????????????????????????????????  
?????????????

'A.\_leguati\*'

10000003000000021000001000000000000000000000000101000000?????????0010100101011000  
0001000000?????????????????00000010001001001100021?00000100001100000000000210000000  
01100?????????????????000010002000001100000000200001000001000010100000000000010200  
1002000010001100??02020000100001100110101001100000010100001100100010000?0000001  
0000001100010001100002001000000121100????????????????????????????????????????????  
????????????????????????????????????????????????????????????????????????????????  
????????????????????????????????????????????????????????????????????????????????  
?????????????

'D.\_hawkinsi\*'

10000013000000021000001000000000000000000000000101000000?????????0010100101011000  
0201000000?????????????????000000100010(01)1001100021?00000100001000000000000210000  
0000110001010001000001000010002000001100000000100001000011000010100000000000010  
200100200001000110001101020000100001100110101001101000010100001100100010000?0000  
10100000011000100011000000011000001211000000????????????????????????????????????











????????????????????????????00000010001001000100021?000001000011000000000000211000000  
001000101100100000100001000200000110000????????????????????????????????????????????  
?????????????????????0??0202000010000110011010100110000001010000110000001000?????????  
????????????????????????????????????????????????????????????0?????????????????????000001200000000000000000  
00010000000000001000000000000000000000002000000000100000000000000000002000001  
00000090010100000040010000000000001000101000100000000101000000000000000000200010  
0020000010

C.\_notatus

?0?????0????????????????????????????????????????????????????????????????????????????  
????????????????????????????????00000010001001000100021?000001000011000000000000211000000  
0010001011001000001000010002000001100000000200000000010000101?????????????????????  
?????????????????????0??0202000010000110011010100110000001010000110000001000?????????  
????????????????????????????????????????????????????????????0?????????????????????000001200000000000000000  
000100000000000010000000000000000000000020000000000000002000000000002000001  
00000030001000000040010000000000001000101000100000000101000000000000000000200010  
0010000010

'A.\_rogersi\*'

1000000000000000100000100000000000000000000001010000000000001010010100101011000  
0001000000002001010000100000010000001000100021300000100001000000000000210000000  
01100010100010000010000100020000011000000002000010000010000101000000000000010200  
1002000010001100011020200001000011001101010011000000101000011000000100000000001  
0000001100010001100000001000000121100000010011010141100000001200000000000000000  
00010000000000000000000000000000000000002000000000000000000000000000000000000000  
000000500000000000100000000000000010002010001000000000000000000000000000000020010  
0120000010

'A.\_elpenor\*'

100000000000000010000010000000?????????000000001000000000000101???0100101011000  
0001000000????????????????0000001000?00?000100021?0?????100001000000000000210000000  
01100010100010000010000100020000011000000002000010000010000101000000000000010200  
100200001000110???020200001000011001101010011000000101000??100100010000?0000001  
00000011000100011000000010000001211000000????????????????????????????????????????  
????????????????????????????????????????????????????????????????????????????????  
????????????????????????????????????????????????????????????????????????????????  
???????????

C.\_crex

1000000000000000100000100000000000000000000000010000000000001010010100101011000  
0001000000002001010000100000010001001000100021200000100001100000000000211000000  
00100010110010000010000100020000011000000002000000000010000101000000000000010200  
1002000010001100011020200001000011001101010011000000101000011001000100000000001  
0000001100010001100000001000000121100000010011010141100000001000000000000000000  
0001000000100000000000000000000010000000000000010000000000200000000002000000  
0000008000000000001000000000000000001010010001000000010000000010000000400110  
0120000010

L.\_exilis

1000000000000000100000100000000000000000000000010000000000001010010100101011002  
00010000000??????10000100000010001001000100021300000100001100000000000210000000  
00100010110010000010000100020000011000000002000000000010000101000000000000010200  
1002000010001100011020200001000011001101010011000000101000011001000100000000001  
000000110001000110000000100000012110000001?????????????00000 (01) 2000000000000000  
000000100000000000000000000000000000000000002000000020000000000001000000000000  
000010000200000000000100200000000000100010100000000000010000000000000000020  
0100020000010



000010000000000000100000000000000000000100101000000000000010000000000000000020  
0100050000010

L.\_levraudi

?0????0????????????????????????????????????????????????????????????????????????  
????????????????????????????????????????????????????????????????????????????????  
????????????????????????????????????????????????????????????????????????????????  
????????????????????0????????????????????????????????????????????????????????????  
????????????????????????????????????????????0????????????????????00000 (01) 20000000000000  
000000100000000000000000000000000000000020000000000000002000000000000000  
00000000000000000010000000000000000001001010000000000001000000000000000020  
0100020000010

L.\_leucopyrrhus

1000000000000000100000100000000000000000000000000000000000001000000000001010010100101011002  
00010000000020010100001000000100010010001000213000001000011000000000000210000000  
0010001011001000001000010002000001100000000200000000001000010100000000000010200  
1002000010001100011020200001000011001101010011000000101000011001000100000000001  
000000110001000110000000100000012110000001001101014110?00000 (01) 2000000000000000  
000000100000000200000000000000000000000000000002000000000000000?000100000000000  
000000000000000000100100200000000010010001010000000000001000000000000100000020  
0100020000010

L.\_xenopterus

1000000000000000100000100000000000000000000000000000000000001000000000001010010100101011002  
0001000000002001010000100000010001001000100021300000100001100000000000210000000  
0010001011001000001000010002000001100000000200000000001000010100000000000010200  
1002000010001100011020200001000011001101010011000000101000011001000100000000001  
000000110001000110000000100000012110000001????????????00000 (01) 2000000000000000  
0000001000000000000000000000000000000000000000020000000000000000000100000000000  
0000100000000000000100100200000000?001000?0?000?00000000001000000000000100000020  
0100020000010

L.\_spilonotus

?0????0????????????????????????????????????????????????????????????????????????  
????????????????????????????????????????????????????????????????????????????????  
????????????????????????????????????????????????????????????????????????????????  
????????????????????0????????????????????????????????????????????????????????????  
????????????????????????????????????????????0????????????????????00000 (01) 20000000000000  
000000100000000000000000000000000000000000000000200000000000000000000000000000  
1000000003000000000001000000000000000100010100000000000010000000000000000020  
0100020000010

L.\_jamaicensis

1000000000000000100000100000000000000000000000000000000000001000000000001010010100101011002  
0001000000002001010000100000010001001000100021300000100001100000000000210000000  
0010001011001000001000010002000001100000000200000000001000010100000000000010200  
1002000010001100011020200001000011001101010011000000101000011001000100000000001  
000000110001000110000000100000012110000001001101014110?00000 (01) 2000000000000000  
000000100000000000000000000000000000000000000002000000000000000000000000000000  
1000000003000000000001000000000100000110010100010000000001000000100000000000020  
0100040000010

L.\_murivagans

?0????0????????????????????????????????????????????????????????????????????????  
????????????????????????????????????????????????????????????????????????????????  
????????????????????????????????????????????????????????????????????????????????  
????????????????????0????????????????????????????????????????????????????????????  
????????????????????????????????????????????0????????????????????00000 (01) 20000000000000























1002000010001100???010200001000011101101010011100000101000??100100010000?0000001  
0000001100?10001000000001000000121100????????????????????????????????????????????  
????????????????????????????????????????????????????????????????????????????????  
????????????????????????????????????????????????????????????????????????????????  
????????????

'H.\_roberti\*'

????????????????????????????????????????????????????????????????????????????????  
????????????????????????????????????????????????????????????????????????????????  
????????????????????????????????????????????????????????????????????????????????  
????????????????????????????????????????????????????????????????????????????????  
????????????????????????0?0200001000011101101010011000000101000??100100010000?0000001  
0000001100????????????????????????????????0????????????????????????????????????  
????????????????????????????????????????????????????????????????????????????????  
????????????????????????????????????????????????????????????????????????????????  
????????????

F.\_rufifrons

100000000000000010000010000000100000000000100001000000000001010010110101011000  
0001000000002001110000100000010001001001100131300000101001000000100000021000000  
0010001011001000001000010002000001100000000200000000001100010100000000000010200  
10020000100011000110102000010000121011010100111000001010010110010001001100010001  
000000110001000100000010100000012110010001011111314110?0000010000000000022300000  
0000000000000000000000000000000000000000000000000000000000000000000000000200100000000  
0000003000000000000000010000000010000002010000100000000100000000100000000120010  
1040001010

F.\_armillata

100000000000000010000010000000100000000000100001000000000001010010110101011000  
00010000000020011100001000000100020010011001313000001010010000001000000210000000  
0010001011001000001000010002000001100000000200000000001100010100000000000010200  
20020000100011000110102000010000121011010100111000001010010110010001001100010001  
000000110001000100000010100000012110010001011111314110?0000010000000000022100000  
0000000000000000000000000000000000000000000000000000000000000000000000000200100000000  
000000300000000000000000000000000001000000201000010000000011000000001000000000100110  
1041001010

F.\_leucoptera

100000000000000010000010000000100000000000100001000000000001010010110101011000  
00010000000020011100001000000100010010011001313000001010010000001000000210000000  
0010001011001000001000010002000001100000000200000000001100010100000000000010200  
20020000100011000110102000010000121011010100111000001010010110010001001100010001  
000000110001000100000010100000012110010001?????????????0000010000000000022100000  
0000000000000000000000000000000000000000000000000000000000000000000000000200100000000  
000000300000000000000000000000000001000000201000010000000011000000001000000000100110  
1040001010

F.\_cornuta

100000000000000010000010000000100000000000100001000000000001010010110101011000  
00010000000020011100001000000100020010011001313000001010010000001000000210000000  
0010001011001000001000010002000001100000000200000000001100010100000000000010200  
20020000100011000110102000010000121011010100111000001010010110010001001100010001  
000000110001000100000010100000012110010001011111314110?0000010000000110020100000  
0100000000000000000000000000000000000000000000000000000000000000000000000200100000000  
00000030000000000000000000000000000100000020100001000000001000000001000000000100010  
1040001011

F.\_gigantea

100000000000000010000010000000100000000000100001000000000001010010110101011000  
00010000000020011100001000000100020010011001313000001010010000001000000210000000



00010000000020011100001000000100020010011001313000001010010000001000000210000000  
0010001011001000001000010002000001100000000200000000001100010100000000000010200  
20020000100011000110102000010000121011010100111000001010010110010001001100010001  
000000110001000100000010100000012110010001011111314110?0000010000000000020000000  
000000000000000000000000000000000000000000000000000000000000000000000200100000000  
00000030000000000000000000000000000020100001000000001100000000100000000100010  
1040001010

'F.\_chathamensis\*'

1000000000000000100000100000001??????????01000010000000?????????0010120201011000  
0001000000?????????????0000001000?001001100131?000001010010000001000000210000000  
0010001010001000001000010002000001100000000200000000001100010100000000000010200  
2002000010001100011010200001000012101101010011100000101001??10010001001100010001  
00000011000100010000001010000001211001000????????????????????????????????????2????????  
????????????????????????????????????????????????????????????????????????????????  
????????????????????????????????????????????????????????????????????????????????  
????????????

'F.\_prisca\*'

1000000000000000100000100000001????????????01000010000000?????????0010120201011000  
000100000?????????????????0000001000?001001100131?000001010000000001000000210000000  
00100010100010000010000100020000011000000002000000000011000101000000000000??????  
?????????????????????010200001000012101101010011100000101001??10010001001100010001  
00000011000100010000001010000001211001000????????????????????????????????????????  
????????????????????????????????????????????????????????????????????????????????  
????????????????????????????????????????????????????????????????????????????????  
????????????

'F.\_newtoni\*'

?????????????????????000100000?01?????????????000????????????????????????????????  
?????????????????????????????0000001000200100?100131?0?????10?001000000100000021?000000  
01100?????????????????????????????????????????????00002000000000011000101000000000????????  
?????????????????????010200001000012101101010011100000101001??100100010011?0010001  
0000001100?10001000000101000000121100????????????????????????????????????????????  
????????????????????????????????????????????????????????????????????????????????  
????????????????????????????????????????????????????????????????????????????????  
????????????

;

END;

BEGIN ASSUMPTIONS;

USERTYPE SR487 STEPMATRIX = 10  
  0 1 2 3 4 5 6 7 8 9  
[0] . 2 2 2 2 2 2 2 1 1  
[1] 2 . 2 2 2 2 2 2 2 2  
[2] 2 2 . 1 2 1 2 1 2 2  
[3] 2 2 1 . 2 1 2 1 2 2  
[4] 2 2 2 2 . 2 2 2 2 2  
[5] 2 2 1 1 2 . 2 1 2 2  
[6] 2 2 2 2 2 2 . 2 2 2  
[7] 2 2 1 1 2 1 2 . 2 2  
[8] 1 2 2 2 2 2 2 2 . 1  
[9] 1 2 2 2 2 2 2 2 1 .

;

OPTIONS DEFTYPE=unord PolyTcount=MINSTEPS ;

CHARSET OSTE0 = 1-361;

CHARSET MYOLINTEG = 362-381;

CHARSET INTEGUMENT = 382-570;

CHARSET FLTLESS = 139 162 170 209 522 536;

TYPESET \* STANDARD = unord: 1-92 97-101 104-109 111-113 115-119 121-124  
126 128-151 153-156 158-203 205-240 242-262 264-273 275-315 317-352 354 356-358  
360-392 394-518 520-532 534-535 537-568 570, ord: 93-96 102-103 110 114 120 125  
127 152 157 204 241 263 274 316 353 355 359 393 519 533 536 569;

TYPESET STANSTEP = unord: 1-92 97-101 104-109 111-113 115-119 121-124 126  
128-151 153-156 158-203 205-240 242-262 264-273 275-315 317-352 354 356-358 360-  
392 394-486 488-518 520-532 534-535 537-568 570, ord: 93-96 102-103 110 114 120  
125 127 152 157 204 241 263 274 316 353 355 359 393 519 533 536 569, SR487: 487;

EXSET \* INVARIANT = 3 5-6 11-15 20-22 26 29-30 34-36 38-42 45 48 50-57 61  
63 65-66 73-76 78 81 83-86 88 91 99-100 105-106 108-110 112-113 118-119 122-123  
126 128 131 133 136 142-144 149-151 161 163-166 175-177 180-182 186 188 192-193  
195 197 199-200 203 207-208 212-213 217 219-220 225-228 230-233 235 239-240 243  
245-247 250 255-256 265-266 268 270-271 277 279-282 285 292 295 297 299 302-303  
305 310 313-314 317 319-320 322-323 326 329-330 335 339-340 344 348-349 357 359  
362 368 375-376;

TAXSET POORFSSL = 40 210;

TAXSET MEDFSSL = 37 59-60 113-114 142 179-184 224;

TAXSET GOODFSSL = 38 83 85 107 115 178 209 222-223;

TAXSET INCOMPL = 29-31 33 37-38 40 45 49-51 56 59-60 66 71-73 75-76 78 80-  
81 83 85 87 89 91-92 93 94 96 101-103 107 109 111 113-115 117-119 121 123-124  
131-135 139-140 142 151 154 156-157 169-171 173 177-184 186 190-193 203 205-206  
210 222-224;

END;

BEGIN PAUP;

END;

BEGIN TREES;

TRANSLATE

1 Ancestor2,  
2 Ps.\_crepitans,  
3 Ps.\_leucoptera,  
4 Ps.\_viridis,  
5 Ar.\_guarauna,  
6 Ba.\_pavonina,  
7 Ba.\_regulorum,  
8 Bu.\_carunculatus,  
9 Le.\_leucogeranus,  
10 An.\_paradisea,  
11 An.\_virgo,

12 Gr.\_vipio,  
13 Gr.\_rubicundus,  
14 Gr.\_antigone,  
15 Gr.\_canadensis,  
16 Gr.\_grus,  
17 Gr.\_nigricollis,  
18 Gr.\_japonensis,  
19 Gr.\_americana,  
20 Gr.\_monachus,  
21 Ho.\_fulica,  
22 Hp.\_personata,  
23 Po.\_senegalensis,  
24 H.\_haematopus,  
25 P.\_porphyrio,  
26 P.\_madagascarien,  
27 P.\_poliocephalus,  
28 P.\_viridis,  
29 P.\_melanopterus,  
30 P.\_indicus,  
31 P.\_bellus,  
32 P.\_melanotus,  
33 'P.\_albus\*',  
34 'P."\_samoensis"',  
35 'P."\_elliotti"',  
36 P.\_pulverulentus,  
37 'P.\_kukwiedei\*',  
38 'N.\_mantelli\*',  
39 'N.\_hochstetteri\*',  
40 A.\_podarces,  
41 P.\_martinica,  
42 P.\_flavirostris,  
43 P.\_alleni,  
44 'H.\_wallacii\*',  
45 G.\_rosenbergii,  
46 G.\_plumbeiventris,  
47 E.\_castaneoventris,  
48 A.\_calopterus,  
49 A.\_axillaris,  
50 A.\_mangle,  
51 A.\_wolffi,  
52 A.\_saracura,  
53 A.\_cajanea,  
54 A.\_albiventris,  
55 A.\_mexicana,  
56 A.\_plumbeicollis,  
57 A.\_ypecaha,  
58 A.\_castaneiceps,  
59 'N.\_debooyi\*',  
60 'N.\_steganinos\*',  
61 C.\_oculeus,  
62 M.\_kioloides,  
63 R.\_rougetii,  
64 'D.\_cuvieri-gp.\*',

65 P.\_maculatus,  
66 'C.\_cerverai\*',  
67 O.\_sanguinolentus,  
68 O.\_nigricans,  
69 '"R."\_madagascarien',  
70 'T.\_sylvestris\*',  
71 'T.\_conditicius\*',  
72 'T.\_lafresnayanus\*',  
73 'N.\_poecilopterus\*',  
74 'N.\_woodfordi\*',  
75 'N.\_immaculatus\*',  
76 'A.\_plateni\*',  
77 R.\_aquaticus,  
78 R.\_indicus,  
79 R.\_caerulescens,  
80 R.\_semitlumbeus,  
81 R.\_antarcticus,  
82 R.\_limicola,  
83 'R.\_sublimicola\*',  
84 R.\_longirostris,  
85 'R.\_sublongirostris\*',  
86 R.\_elegans,  
87 R.\_wetmorei,  
88 H.\_philippensis,  
89 H.\_christophori,  
90 H.\_sethsmithi,  
91 H.\_goodsoni,  
92 H.\_ecaudatus,  
93 H.\_assimilis,  
94 H.\_macquariensis,  
95 'H.\_dieffenbachii\*',  
96 'H.\_roviana\*',  
97 'H.\_owstoni\*',  
98 'H.\_wakensis\*',  
99 H.\_striatus,  
100 H.\_pectoralis,  
101 H.\_muelleri,  
102 H.\_mirificus,  
103 'S.\_sharpei\*',  
104 'G.\_australis\*',  
105 'G.\_greyi\*',  
106 'C.\_modestus\*',  
107 'C.\_karamu\*',  
108 'H.\_insignis\*',  
109 'H.\_okinawae\*',  
110 H.\_torquatus,  
111 H.\_sulcirostris,  
112 H.\_celebensis,  
113 'A.\_bonasia\*',  
114 'A.\_leguati\*',  
115 'D.\_hawkinsi\*',  
116 R.\_tricolor,  
117 R.\_victa,

118 R.\_canningi,  
119 R.\_fasciata,  
120 R.\_eurizonoides,  
121 R.\_amauroptera,  
122 R.\_rubra,  
123 R.\_leucospila,  
124 R.\_mayri,  
125 R.\_forbesi,  
126 S.\_pulchra,  
127 S.\_elegans,  
128 S.\_rufa,  
129 S.\_lugens,  
130 S.\_boehmi,  
131 S.\_affinis,  
132 S.\_antonii,  
133 S.\_insularis,  
134 S.\_ayresi,  
135 S.\_watersi,  
136 A.\_concolor,  
137 M.\_schomburgkii,  
138 C.\_noveboracensis,  
139 C.\_exquisitus,  
140 C.\_notatus,  
141 'A.\_rogersi\*',  
142 'A.\_elpenor\*',  
143 C.\_crex,  
144 L.\_exilis,  
145 L.\_melanophaius,  
146 L.\_albigularis,  
147 L.\_cinereiceps,  
148 L.\_fasciatus,  
149 L.\_viridis,  
150 L.\_ruber,  
151 L.\_levraudi,  
152 L.\_leucopyrrhus,  
153 L.\_xenopterus,  
154 L.\_spilonotus,  
155 L.\_jamaicensis,  
156 L.\_murivagans,  
157 P.\_spiloptera,  
158 P.\_cinerea,  
159 P.\_flaviventer,  
160 P.\_egregia,  
161 P.\_porzana,  
162 P.\_marginalis,  
163 P.\_carolina,  
164 P.\_albicollis,  
165 P.\_parva,  
166 P.\_pusilla,  
167 P.\_fluminea,  
168 P.\_fusca,  
169 P.\_paykullii,  
170 P.\_bicolor,

171 P.\_olivieri,  
172 P.\_flavirostra,  
173 'P.\_monasa\*',  
174 'P.\_atra\*',  
175 P.\_tabuensis,  
176 'P.\_palmeri\*',  
177 'P.\_sandwichensis\*',  
178 'P.\_subcarolina\*',  
179 'P.\_astrictocarpus\*',  
180 'P.\_ziegleri\*',  
181 'P.\_menehune\*',  
182 'P.\_keplerorum\*',  
183 'P.\_ralphorum\*',  
184 'P.\_servernsi\*',  
185 N.\_erythrops,  
186 N.\_colombianus,  
187 A.\_phoenicurus,  
188 A.\_olivaceus,  
189 A.\_moluccanus,  
190 A.\_ruficrissum,  
191 A.\_akool,  
192 A.\_isabellinus,  
193 'A.\_ineptus\*',  
194 G.\_cinerea,  
195 P.\_melanops,  
196 G.\_chloropus,  
197 G.\_pyrrhorhoa,  
198 G.\_cachinnans,  
199 G.\_galeata,  
200 G.\_sandvicensis,  
201 G.\_angulata,  
202 G.\_tenebrosa,  
203 'P.\_nesiotis\*',  
204 'P.\_comeri\*',  
205 'E.\_silvestris\*',  
206 'P.\_pacifica\*',  
207 T.\_ventralis,  
208 'T.\_mortierii\*',  
209 'T.\_hodgenorum\*',  
210 'H.\_roberti\*',  
211 F.\_rufifrons,  
212 F.\_armillata,  
213 F.\_leucoptera,  
214 F.\_cornuta,  
215 F.\_gigantea,  
216 F.\_americana,  
217 F.\_caribaea,  
218 F.\_alai,  
219 F.\_ardesiaca,  
220 F.\_cristata,  
221 F.\_atra,  
222 'F.\_chathamensis\*',  
223 'F.\_prisca\*',



224 'F.\_newtoni\*'

;

TREE \* UNTITLED = [&R]

(1, ((2, (3, 4)), (5, ((6, 7), (8, ((9, (((12, (13, 14))), (16, (17, (18, 19))))), 20), 15))), (10, 11))))), ((21, 23), 22), (24, (((((25, 27), (26, 36))), ((28, 35), 32), 34)), 39), ((41, 43), 42)), ((44, 46), ((47, ((48, 52), ((53, (54, 55))), 57))), (61, 62)), (58, ((63, (((((64, (((77, ((82, 86), 84))), ((88, 90), 99), 100)), 79)), 69), ((70, ((95, (97, 98))), (104, 105))), 106), 141), (74, (108, (110, 112))))), (65, (67, 68))), (((((((((137, 138), 159), (143, (160, 164))), (158, 162))), (((((161, (163, 167))), (194, (195, (((((196, (197, 198, 199, 200))), 201), 202), ((204, 209), (211, ((212, 213), ((216, 217), 218, 219), (220, 221))), (214, 215))))), (207, 208))))), 166), 176), 165)), ((172, 174), (185, ((187, 189), 188), 193))), 175), 168), (((((144, (152, 153))), 146), 147), 145), 148, ((149, 150), 155))), ((116, ((122, 125), (126, (127, (128, (129, 130))))))), 120))), 136))))))));

END;

BEGIN MACCLADE;

v 3.0

-1293940763

0100&/0

0

0

END;







1002000010001100011020210001000011001101010011000000101000??100100010000?0000001  
0000001000?11001100001001110000101010?????????????????????????????????????????  
?????????????????????????????????????????????????????????????????????????????  
?????????????????????????????????????????????????????????????????????????????  
????????????

'N.\_hochstetteri\*'

11000011000000011110000000000000000000010000001010010000000000101010010111101011010  
00010000000030010100002000000100010010011000212010001000010000000000000210000000  
0110001010001000001000010002100001100000000201001000001000010100000000000010200  
10020000100011000110202100010000110011010100110000001010000010010001000000000001  
00000010001110011000010011100001010100000100110121411000000013000000000020000000  
000000000000000000001000000000000000000000000000000200000000000000000000000000310000000  
0000006200000000000000010000000100000001010000100000000010003000000001000001000010  
0330000020

A.\_podarces

????????????????????????????????????????????????????????????????????????????10110101011000  
000100000????????????????????????????????????????????????????????????????????????  
????????????????????????????????????????????????????????????????00002010000000010000101000000000??010200  
200200001000110????????????????????????????????????????????????????????????????100100010000?0000001  
00000011001100011000000010000001011100010????????????????????????????????????????????  
????????????????????????????????????????????????????????????????????????????????????  
????????????????????????????????????????????????????????????????????????????????????  
????????????

P.\_martinica

11000000000000001100000000000000000000010000001000010000000000101010010110101011000  
000100000000200101000020000001000100100110002120100010000110000000000000310000000  
0010001011001000001000010002100001100000000201000000001000010100000000000010200  
20020000100011000110202100010000110011010100110000001010000010010001000000000001  
00000011001110011000010010100001010100010100110121411000000013000000000020000001  
00000000000000000001000000000000000000000002000000000000000000000000000000000310000000  
0000006200000000000000010000000100000001010000100000000010001000000001000001000010  
0300000030

P.\_flavirostris

11000000000000001100000000000000000000010000001000010000000000101010010110101011000  
000100000000200101000020000001000100100110002120100010000110000000000000310000000  
0010001011001000001000010002100001100000000201000000001000010100000000000010200  
20020000100011000110202100010000110011010100110000001010000010010001000000000001  
000000110011100110000100101000010101000101????????????????0000010000000000020000000  
000000000000000000010000000000000000000000020000000000000002000000000310000000  
0000006?0000000000000001000000010000000101000010000000001000100000000100000200010  
0300000030

P.\_alleni

11000000000000001100000000000000000000010000001000010000000000101010010110101011000  
000100000000200101000020000001000100100110002120100010000110000000000000310000000  
0010001011001000001000010002100001100000000201000000001000010100000000000010200  
20020000100011000110202100010000110011010100110000001010000010010001000000000001  
00000011001110011000010010100001010100010100110121411000000013000000000020000001  
00000000000000000001000000000000000000000002000000000000000000000000000000000310000000  
0000006200000000000000010000000100000001010000100000000010001000000001000001000010  
0330000030

'H.\_wallacii\*'

2000000100000000100000000000000000000000000101000000000001010010100101011000  
0001000000002001010000100000010001001001100021201000100000100000000000210000000



???????????????????????? (12) 00000010001001001100021?0100010000 (01) 10000000 (01) 0000  
3100000000001000101100100000100001000210000110000000010000000000????????????????  
?????????????????????????????0??0202 (01) 00010000110011010100110000001010000010010001  
0000?????????????????????????????????????????????????????????0?????????????????????0000010000100  
000000000000000100000000000000001000000000000000000020000000000000000010000000  
0000000000000100000000000010000001000000000000010201000010000000001000001000000  
0000000300100130000000

A.\_wolfi

?0?????0????????????????????????????????????????????????????????????????????????????  
????????????????????????????????????????????????????????????????????????????????????  
????????????????????????????????????????????????????????????????????????????????????  
?????????????????????0????????????????????????????????????????????????????????????  
?????????????????????????????????????????????????????????0?????001101010110?000001000000000010000000  
000100000000000000000001000000000000000000020000000000000000100000000000000000  
0100000000000000000001001000000000010201000010000000001000001000000000000030010  
0130000000

A.\_saracura

10000000000000010000000000000000000000000000100000000000001010010100101011000  
00010000000??????10000 (12) 0000001000100100110002120100010000 (01) 10000000 (01) 0000  
310000000000100010110010000010000100021000011000000001000000000010000101000000000  
00001020010020000100011000110202 (01) 00010000110011010100110000001010000010010001  
0000000000001000000100001000110000000100000012110000001001101010110?0000010000000  
000000000000000100000000000000001000000000000000002000000000000000010000000  
00000000000000002000000000000000100100000000001020100001000000000100000000000  
0000000300100130000000

'A.\_cajanea-gp.'

10000000000000010000000000000000000000000000100000000000001010010100101011000  
0001000000002011010000 (12) 0000001000100100110002120100010000 (01) 10000000 (01) 0000  
310000000000100010110010000010000100021000011000000001000000000010000101000000000  
00001020010020000100011000110202 (01) 00010000110011010100110000001010000010010001  
0000000000001000000100001000110000000100000012110000001001101010110?0000010000000  
00000000000000010000000000000000100000000000000000200000000000000001000 (01)  
0000000000000000 (01) 10002000000001 (01) 00000100100000000001020100001000000001000  
00100000000000000300100130000000

A.\_ypecaha

10000000000000010000000000000000000000000000100000000000001010010100101011000  
00010000000??????10000 (12) 0000001000100100110002120100010000 (01) 10000000 (01) 0000  
310000000000100010110010000010000100021000011000000001000000000010000101000000000  
00001020010020000100011000110202 (01) 00010000110011010100110000001010000010010001  
0000000000001000000100001000110000000100000012110000001001101010110?0000010000000  
000000000000000100000000000000001000000000000000002000000000000000010000000  
000000000000000020000000010000001001000000000010201000010000000001000001000000  
0000000300100130000000

A.\_castaneiceps

1000000200000000100000000000000000000000000010000000000001010010000101011000  
0001000000002001010000100000010001001000100021200000100001100000000000210000000  
0010001011001000001000010002100001100000000100000000001000010100000000000010200  
1002000010001100011020200001000011001101010011001000101000001001000100000000001  
000000100001000100000000100000012110000001?????????????0000001000000000000000000  
0001000000002000000000000000000000000002000000000000000000000000000000000000  
00000000000000010000002000000000000010101100000000000010000000000000000000010  
0130000000





0000000000000001001000000000000001000201000000000000010000000000000000020010  
0120000000

P.\_maculatus

10000000000000010000010000000000000000000101000000000001010010100101011000  
0001000000002011010000100000010001001000100021200000100001100000000000210000000  
0010001011001000001000010002000001100000000200000000001000010100000000000010200  
1002000010001100011020200001000011001101010011000000101000011001000100000000001  
000000110001000110000000100000012110000001?????????????000001000001000000000000  
00010000000000000000000000000000000000002000000000000000000000000000000000020  
00000000000000000001000000000000101010201000000000000010000000000000000000020010  
0130000000

'C.\_cerverai\*'

?0????00?????????????????????????????????????????????????????????????00?????????  
?????????????020110?????????0000001000?00?00010002120??00100001000000000000210000000  
00100?????????000001000010002100001100000000200000000001000010100000000??010200  
1002000010001100??02020000100001100110101001100000010100001100100010000?0000001  
0000001100?100011000000010000001211000000?????????????0000001000101000000000000  
0001000000000000000001000000000000000000200000000000000020000000000000000000  
000000300000000000010000000000000010000101000000000000010000000000000000020010  
0130000000

O.\_sanguinolentus

20000000000000010000010000000000000000000101000000000001010010100101011000  
0001000000002011010000100000010001001000100021200000100001100000000000210000000  
0010001011001000001000010002000001100000000200000000001000010100000000000010200  
1002000010001100011020200001000011001101010011000000101000011001000100000000001  
000000110001000110000000100000012110000001001101014110?000001000001000000000000  
0001000000000000000001000000000000000002000000000000000000000000000000000000  
00000030000000000001000000000000001010201000000000000010000000000000000000010010  
0130000000

O.\_nigricans

20000000000000010000010000000000000000000101000000000001010010100101011000  
00010000000?????10000100000010001001000100021200000100001100000000000210000000  
0010001011001000001000010002000001100000000200000000001000010100000000000010200  
1002000010001100011020200001000011001101010011000000101000011001000100000000001  
000000110001000110000000100000012110000001001101014110?000001000000000000000000  
0001000000000000000001000000000000000002000000000000000200000000000000000000  
00000030000000000001000000000000001010201000000000000010000000000000000000010010  
0130000000

'"R."\_madagascarien'

10000000000000010000011000000000000000000101000000000001010010100101011000  
0001000000002001010000100000010001001000100021200000100001100000000000210000000  
0010001011001000001000010002000001100000000200000000001000010100000000000010200  
1002000010001100011020200001000011001101010011000000101000011001000100000000001  
00000011000100011000000010000001211000000?????????????00000130000000000000000000  
0001000000000000000001000000000000000002000000000000000000000000000000000000  
00000000000000000001000000000000010100010100000000000010000000000000000000010010  
0120000000

'T.\_sylvestris-gp.\*'

100000000000000100000100000000000000000?0001010000000000001010010100101011000  
0001000000002001010000100000010001001000100021200000100001000000000000210000000  
0110001010001000001000010002000001100000000200001000001000010100000000000010200  
1002000010001100011020200001000011001101010011000000101000011001000100000000001  
000000110001000110000000100000012110000001001101014110000000110000000000000000000



????????????????????????????????????????????????????????????0000011000001000000000000  
000100000010000000000000000000000011000001000000000000000000000000000002000000000001000000  
000000200000000000100000000000000101000201000000000000001000000000100000000020010  
0120000000

R.\_limicola

20000000000000001000001100000000000000000000000001010000000000001010010100101011000  
00010000000020110100001000000100010010001000212000001000011000000100000211000000  
00100010110010000010000100020000011000000002000000000010000101000000000000010200  
1002000010001100011020200001000011001101010011000000101000011001000100000000001  
00000011000100011000000010000001211000000100110101411000000011000001000000000000  
00010000001000000000000000000011000001000000000000000000002000000000001000000  
0000008000000000000100000000000000100020100000000000000100000000010000000020010  
0120000000

'R.\_longirostris-gp.'

20000000000000001000001100000000000000000000000001010000000000001010010100101011000  
00010000000020110100001000000100010010001000212000001000011000000100000211000000  
00100010110010000010000100020000011000000002000000000010000101000000000000010200  
1002000010001100011020200001000011001101010011000000101000011001000100000000001  
00000011000100011000000010000001211000000100110101411000000011000001000000000000  
00010000001000000000000000000011000001000000000000000000002000000000001000000  
0000008000000000000100 (01) 0000000000001000201000000000000001000000000 (01) 0000000  
0200100120000000

'R.\_Bermuda-gp.'

20000?00000????????????????????????????????????????0??1????????????????????????????????  
????????????????????????????????????????0000001000?00?000100021?0000010?0011000000100000211000000  
01100010110010000010000100020000011000000002000000000010000101000000000000010200  
100200001000110????020200001000011001101010011000000101000??1001000100000000001  
00000011000100011000000010000001211000000?????????????????????????????????????????  
?????????????????????????????????????????????????????????????????????????????????????  
?????????????????????????????????????????????????????????????????????????????????????  
?????????????

R.\_wetmorei

?0?????0????????????????????????????????????????????1????????????????????????????????  
????????????????????????????????????????????????????????????????????????????????????  
????????????????????????????????????????????????????????????????????????????????????  
?????????????????0????????????????????????????????????????????????????????????????  
????????????????????????????????????????????0????????????????????????????????000001100000100000000000  
00010000001000000000000000000011000000000000000000000000002000000000001000000  
00000080000000000000000000000000000201000000000000010000000000000000020010  
0120000000

'H.\_philippenisis-gp.'

20000000000000001000001100000000000000000000000001010000000000001010010100101011000  
00010000000020010100001000000100010010001000212000001000011000000100000211000000  
00100010110010000010000100020000011000000002000000000010000101000000000000010200  
1002000010001100011020200001000011001101010011000000101000011001000100000000001  
000000110001000110000000100000012110000001001101014110?0000011000001000000000000  
00010000001000000000000000000011000010010020000000000000000200010000000020000 (1  
23) 00000020000000 (12) 000100 (01) 000000 (12) 0000010002010001010000000010000300000  
00100000200100120000000

'H.\_dieffenbachii\*'

20000000000000001000001100000000000000000000000001010000000000001010010100101011000  
000100000000????????????????0000001000?001000100021?000001000011000000100000211000000  
01100010100010000010000100020000011000000002000010000010000101000000000000010200





00010000000020010100001000000100010010001000212000001000011000000100000210000000  
001000101100100000100001000200000110000000020000000001000010100000000000010200  
1002000010001100011020200001000011001101010011000000101000011001000100000000001  
000000110001000110000000100000012110000001001101014110?0000012000000000000000000  
00010000000000000000000000000000000000112000000000000 (02) 00000000000000000000  
0000000005000000 (012) 0004000000000000000010002010000000000000100002000000001000  
01200100120000000

'A.\_bonasia\*'

1000000300000002100000100000000000000000000000101000000????????0010100101011000  
0001000000????????????00000010001001000100021?00000100001000000000000210000000  
0110001010001000001000010002000001100000000200001000001000010100000000000010200  
1002000010001100011020200001000011001101010011000000101000??100100010000?0000001  
00000011000100011000000010000001211000000?????????????????????????????????????  
????????????????????????????????????????????????????????????????????????????????  
????????????????????????????????????????????????????????????????????????????????  
????????????

'A.\_leguati\*'

1000000300000002100000100000000000000000000000101000000????????0010100101011000  
0001000000????????????????000000100010010001100021?000001000011000000000000210000000  
01100????????????????000010002000001100000000200001000001000010100000000000010200  
1002000010001100??02020000100001100110101001100000010100001100100010000?0000001  
0000001100010001100002001000000121100????????????????????????????????????????  
????????????????????????????????????????????????????????????????????????????????  
????????????????????????????????????????????????????????????????????????????????  
????????????

'D.\_hawkinsi\*'

1000001300000002100000100000000000000000000000101000000????????0010100101011000  
0201000000????????????????000000100010 (01) 1001100021?00000100001000000000000210000  
0000110001010001000001000010002000001100000000100001000011000010100000000000010  
200100200001000110001101020000100001100110101001101000010100001100100010000?0000  
10100000011000100011000000011000001211000000????????????????????????????????????  
????????????????????????????????????????????????????????????????????????????????  
????????????????????????????????????????????????????????????????????????????????  
????????????

'R.\_tricolor-gp.'

1000000000000000100000000000000000000000000100001000000000001010010100101011000  
00010000000020010100001000000100010010001000212000001000011000000000000210000000  
0010001011001000001000010002000001100000000200000000001000010100000000000010200  
1002000010001100011020200001000011001101010011000000101000011001000100000000001  
000000110001000100000000100000012110000001001101014010?000000000000000000000000  
00010000000020000000000000000000000000000200000000000000002000100000000000000  
0100000000000010010000000000000010001000000210000000100002000000000000020010  
0110000000

R.\_canningi

?0?????0????????????????????????????????????????????????????????????????????  
????????????????????????????????????????????????????????????????????????????  
????????????????????????????????????????????????????????????????????????????  
?????????????????0????????????????????????????????????????????????????????  
????????????????????????????????????????????????????????????????????????????  
0001000000002000000000000000000000000000020000000000000000001000004000000000  
010000000000001001000000000000001000100000020000000010000200000001000020010  
0140000000









0000001100?100011000000010000001211000000????????????0000000200000000000000000000  
000100000000010000000000000000000100000000002000000100000000002000000000002000000  
100000900000000000000001000000000000000010100000010000000100000000010000000000010  
0030000010

'C.\_novaborcensis-gp.'

100000000000000010000010000000000000000000000000000000000000000000001010010100101011002  
0001000000002001010000100000010001001000100021200000100001100000000000211000000  
001000101100100000100001000200000110000000020000000001000010100000000000010200  
1002000010001100011020200001000011001101010011000000101000011000000100000000001  
000000110001000110000000100000012110000001001101014110000001(12)00000000000000  
000000100000000000(01)000000000000(01)0000000002000000001000000(02)000000  
00000200000100000090010(01)0000004001000000000000100010100010000000010100000000  
0000000002000100020000010

C.\_notatus

?0?????0????????????????????????????????????????????????????????????????????????  
????????????????????????????????????????00000010001001000100021?00000100001100000000000211000000  
00100010110010000010000100020000011000000002000000000010000101????????????????  
?????????????????0???0202000010000110011010100110000001010000110000001000????????  
????????????????????????????????????????????????????????????000001200000000000000000  
0001000000000000010000000000000000000000000020000000000000000200000000002000001  
000000300010000000400100000000000010001010001000000001010000000000000000200010  
00100000010

'A.\_rogersi\*'

10000000000000001000001000000000000000000000000000000101000000000001010010100101011000  
0001000000002001010000100000010000001000100021300000100001000000000000210000000  
0110001010001000001000010002000001100000000200001000001000010100000000000010200  
1002000010001100011020200001000011001101010011000000101000011000000100000000001  
0000001100010001100000001000000121100000010011010141100000001200000000000000000  
00010000000000000000000000000000000000000000200000000000000000000000000000000000  
000000500000000000100000000000000010002010001000000000000000000000000000000020010  
0120000010

'A.\_elpenor\*'

1000000000000000100000100000000????????????000000001000000000000101???0100101011000  
0001000000????????????????0000001000?00?000100021?0?????1000010000000000000210000000  
01100010100010000010000100020000011000000002000010000010000101000000000000010200  
100200001000110?????020200001000011001101010011000000101000??100100010000?0000001  
00000011000100011000000010000001211000000????????????????????????????????????  
????????????????????????????????????????????????????????????????????????????  
????????????????????????????????????????????????????????????????????????????  
????????????

C.\_crex

100000000000000010000010000000000000000000000000000000000000000000001010010100101011000  
0001000000002001010000100000010001001000100021200000100001100000000000211000000  
0010001011001000001000010002000001100000000200000000001000010100000000000010200  
1002000010001100011020200001000011001101010011000000101000011001000100000000001  
0000001100010001100000001000000121100000010011010141100000001000000000000000000  
000100000010000000000000000000000000000000000000000020000000000002000000  
0000008000000000001000000000000000000010100100010000000100000000100000000400110  
0120000010

L.\_exilis

100000000000000010000010000000000000000000000000000000000000000000001010010100101011002  
00010000000?????10000100000010001001000100021300000100001100000000000210000000  
0010001011001000001000010002000001100000000200000000001000010100000000000010200





????????????????????????????????????????????????????????????????????????????????????????????  
????????????????????????????????????????????????????????????????????????????????????????????  
????????????????????0????????????????????????????????????????????????????????????????????????  
????????????????????????????????????????????????????????????0????????????????????????????000001200000000000000000  
0001000000100000000000000000000000100000000020000000000000000000000000000000000000000200000  
0000003000000000001000000000000000010001010000001000000010000000100000000100000000020010  
0040000010

P.\_cinerea

10000000000000001000001000000000000000000000000001000010000000000001010010100101011002  
0001000000002001010000100000010001001000100021200000100001100000000000210000000  
0010001011001000001000010002000001100000000200000000001000010100000000000010200  
1002000010001100011020200001000011101101010011000000101000011001000100000000001  
0000001100010001100000001000000121100000010011010141100000001000000000000000000  
0001000000000000000000000000000010100000000200000000000000002100000000002000000  
00000020000000000000001001000000000010010100000010000000100000000100000000001010  
0040000010

P.\_flaviventer

10000000000000001000001000000000000000000000000001000010000000000001010010100101011002  
0001000000002?01010000100000010001001000100021200000100001100000000000210000000  
0010001011001000001000010002000001100000000200000000001000010100000000000010200  
1002000010001100011020200001000011001101010011000000101000011001000100000000001  
000000110001000110000000100000012110000001????????????000001200000000000000000  
000100000000000000000000000000000010000000000200000000000000002000000000002000000  
1000009000000000001001000000000000100010100000010000000100000000000000000020010  
0000000010

P.\_egregia

10000000000000001000001000000000000000000000000001000010000000000001010010100101011000  
0001000000002001010000100000010001001000100021200000100001100000000000210000000  
0010001011001000001000010002000001100000000200000000001000010100000000000010200  
1002000010001100011020200001000011001101010011000000101000011001000100000000001  
0000001100010001100000001000000121100000010011010141100000001000100000000000000  
0001000000100000000000000000000000100000010002000000000000000002000000000002000000  
000000200000000000100000000000000010001010000001000000010000000000000000020010  
0020000010

P.\_porzana

10000000000000001000001000000000000000000000000001000010000000000001010010100101011002  
0001000000002001010000100000010001001000100021200000100001100000000000210000000  
0010001011001000001000010002000001100000000200000000001000010100000000000010200  
1002000010001100011020200001000011101101010011000000101000011001000100000000001  
000000110001000110000000100000012110000001001101014110?0000010001000000000400000  
0001000000100000000000000000000010001000000000020000000010000000000000000002000100  
000000200000000000110010000000000010001010100001000000010000000100000000020110  
0040000010

P.\_marginalis

10000000000000001000001000000000000000000000000001000010000000000001010010100101011002  
0001000000002001010000100000010001001000100021200000100001100000000000210000000  
0010001011001000001000010002000001100000000200000000001000010100000000000010200  
1002000010001100011020200001000011001101010011000000101000011001000100000000001  
000000110001000110000000100000012110000001001101014110?000101000000000000000000  
00010000000000000000000000000000001000000000020000000000000002000000000002000000  
0000002000001000000000001000000000010010100000010000000100000000100000000001010  
0040000010









0010000001100010001100000001000000121100????1?????????????????????????????????  
?????????????????????????????????????????????????????????????????????????????  
?????????????????????????????????????????????????????????????????????????????  
???????????????

'N.\_erythrogs-gp.'

1000000000000001000001000000000000000000100001000000000001010010100101011000  
00010????00????????????????????????????????001000100021?00000100001100000000000210000000  
001000101100100000100001000200000110000000020000000001000010100000000000010200  
1002000010001100011020200001000011001101010011000000101000011001000100000000001  
00000011000100011000000010000001211000000?001101014110?00000000100000000400000  
000100000000000000000000000000000000020000000000000000000000000000000000000  
0000020000000000010000000000000001001010000000000001000000000000000001(02)0  
0100130000010

A.\_phoenicurus

10000000000000010000010000000100000000000100001000000000001010010100101011000  
000100000000200101000010000001000100100010002120000010100110000000000210000000  
001000101100100000100001000200000110000000020000000001000010100000000000010200  
1002000010001100011020200001000011101101010011100000101000011001000100000000001  
000000110001000110000000100000012110000001001101014110000000100000000000200000  
00010000000000000000000000000000000000000000000000000000000000020000000000000000  
000000201000000000000001000000000010010000000000000010000000000000000100010  
0100000010

'A.\_olivaceus-gp.'

10000000000000010000010000000100000000000100001000000000001010010100101011000  
000100000000200101000010000001000100100010002120000010100110000000000210000000  
001000101100100000100001000200000110000000020000000001000010100000000000010200  
1002000010001100011020200001000011101101010011100000101000011001000100000000001  
000000110001000110000000100000012110000001001101014110?000001000000000000(02)00  
00000010000000000000000000000000000000000000000000000000000000000000000000000000  
00000000(23)000000000000000000000000000000010010000000000000010000000000000000  
1000100120000010

A.\_akool

100000000000000100000100000001000000000001000010000000000010100101001?1011000  
000100?0?00????????????????????????????????????????????????????????????????????  
????????????????????????????????????????????????????????????????????????????  
????????????????????????????????????????????????????????????????????????????  
0000000000000010200  
1002000010001100011????????????????????????????????????????????????????????????  
0000001100?100011000000010000001211000000?001101014110?0000010000000000000000  
0001000000000000000000000000000000000000000000000000000002000000000000000000  
0000020000000000000000000000000000000000000000000000000000000000000000010  
0120000010

A.\_isabellinus

100000000000000100000100000001000000000001000010000000000010100101001?1011000  
000100?0?00????????????????????????????????????????????????????????????????????  
????????????????????????????????????????????????????????????????????????????  
????????????????????????????????????????????????????????????????????????????  
0000000000000010200  
1002000010001100011????????????????????????????????????????????????????????????  
0000001100?100011000000010000001211000000????????????????0000010000000000000000  
0001000000000000000000000000000000000000000000000000000002000100000000000000  
0000000000000001000000000000000000000000000000000000000000000000000000010  
0120000010

'A.\_ineptus\*'

100000000000000100000100000001000000000001000010000000000010100101001?1011000  
000100?0?00????????????????????????????????????????????????????????????101001000000000000110000000  
011000101000100000100001000200000110000????????????????????????????????000000000000010200

1002000010001100011????????????????????????????????????????????????????????????0000001  
00000011000100011000000010000001211000000?001101014110?0000000000000000010000000  
00010000000000000000010000000000000000000000000000000000000000000000200010000000000000  
0000000000000000000000000000000000000000000100001100000000000010000000000000000000010  
0120000010

G.\_cinerea

100000000000000001000001000000010000000000001000010000000000001010010100101011000  
0001000000002001010000100000010001001000100021200000100001100000000000210000000  
0010001011001000001000010002000001100000000200000000001000010100000000000010200  
1002000010001100011010200001000011101101010011100000101000011001000100000000001  
0000001100010001000000001000000121100000010011010141100000101000000000020100000  
10010000000000000000001000000000000000020000000000000000000000000000000000002000000  
00000030000000000004001000000000000100010100000010000000100000000100000000020110  
0030000010

P.\_melanops

100000000000000001000001000000010000000000001000010000000000001010010100101011002  
00010000000020010100001000000100010010001000212000001010011000001000000210000000  
0010001011001000001000010002000001100000000200000000001000010100000000000010200  
1002000010001100011010200001000011101101010011100000101000011001000100000000001  
000000110001000100000000100000012110010001001101014110?000001000000000022000000  
00010000000000100000000100000000000000002000000000000000000000000000000000000000  
000000200000000000101100000000010010002010000000000000100000000110000000020110  
1040000110

'G.\_chloropus-gp.'

100000000000000001000001000000010000000000001000010000000000001010010110101011000  
00010000000020010100001000000100010010001000212000001010011000001000000210000000  
0010001011001000001000010002000001100000000200000000001000010100000000000010200  
1002000010001100011010200001000011101101010011100000101000011001000100000000001  
000000110001000100000000100000012110010001101101114110000000100000000002(01)300  
00000000000000000000000000000000000000000000000000000000000000000000000000000001005000000  
0000000003000000000000011000000000(12)00000020100001000000000100000000100000000100000000  
1201101041000110

G.\_angulata

100000000000000001000001000000010000000000001000010000000000001010010110101011000  
00010000000?0000?100001000000100010010001000212000001010011000001000000210000000  
0010001011001000001000010002000001100000000200000000001000010100000000000010200  
1002000010001100011010200001000011101101010011100000101000011001000100000000001  
000000110001000100000000100000012110010001101101114110?000001000000000022100000  
000000000000000000000000000000000000000000000000000000000000000000000000000000010050000000  
00000030000000000000010000000000100000020100001000000000100000000100000000120110  
1040000110

G.\_tenebrosa

100000000000000001000001000000010000000000001000010000000000001010010110101011000  
00010000000020010100001000000100010010001000212000001010011000001000000210000000  
0010001011001000001000010002000001100000000200000000001000010100000000000010200  
1002000010001100011010200001000011101101010011100000101000011001000100000000001  
000000110001000100000000100000012110010001101101114110?000001000000000020300000  
000000000000000000000000000000000000000000000000000000000000000000000000000000010050000000  
000000300000000000000000000000000000000000000000000000000000000000000000000000010050000000  
1031000110

'P.\_nesiotis-gp.\*'

100000000000000001000001000000010000000000001000010000000000001010010110101011000  
00010000000020010100001000000100010010001000212000001010010000001000000210000000





'F.\_americana-gp.'

10000000000000001000001000000010000000000001000010000000000001010010110101011000  
00010000000020011100001000000100020010011001313000001010010000001000000210000000  
0010001011001000001000010002000001100000000200000000001100010100000000000010200  
20020000100011000110102000010000121011010100111000001010010110010001001100010001  
0000001100010001000000101000000121100100010111113141100000001020000000 (01) 200 (0  
1) (01) (01) 000000000000000000000000000000000000000000000000000000000000000000000002  
001000000000000000300000000000000000000000000000000000000000000000000000000000000000000  
0000001001101041001010

F.\_cristata

10000000000000001000001000000010000000000001000010000000000001010010110101011000  
00010000000020011100001000000100020010011001313000001010010000001000000210000000  
00100010110010000010000100020000011000000002000000000011000101000000000000010200  
20020000100011000110102000010000121011010100111000001010010110010001001100010001  
000000110001000100000010100000012110010001011111314110?0000010000000000020000010  
000000000000000000000000000000000000000000000000000000000000000000000000000000000000000  
000000300000000000000000000000000000000000000000000000000000000000000000000000000000000  
1040001010

F.\_atra

10000000000000001000001000000010000000000001000010000000000001010010110101011000  
00010000000020011100001000000100020010011001313000001010010000001000000210000000  
00100010110010000010000100020000011000000002000000000011000101000000000000010200  
20020000100011000110102000010000121011010100111000001010010110010001001100010001  
000000110001000100000010100000012110010001011111314110?0000010000000000020000000  
000000000000000000000000000000000000000000000000000000000000000000000000000000000000000  
000000300000000000000000000000000000000000000000000000000000000000000000000000000000000  
1040001010

'F.\_chathamensis-gp.\*'

1000000000000000100000100000001????????????01000010000000?????????0010120201011000  
0001000000????????????????0000001000?001001100131?0000010100 (01) 0000001000000210000  
00000100010100010000010000100020000011000000002000000000011000101000000000000010  
2002002000010001100011010200001000012101101010011100000101001??10010001001100010  
00100000011000100010000001010000001211001000?????????????????????????????????????????  
?????????????????????????????????????????????????????????????????????????????????????  
?????????????????????????????????????????????????????????????????????????????????????  
?????????????????

'F.\_newtoni\*'

????????????????????000100000?01????????????000?????????????????????????????????????  
????????????????????????????????0000001000200100?100131?0?????10?001000000100000021?000000  
01100????????????????????????????????????????00002000000000011000101000000000?????????  
????????????????????010200001000012101101010011100000101001??100100010011?0010001  
0000001100?10001000000101000000121100?????????????????????????????????????????????????  
?????????????????????????????????????????????????????????????????????????????????????  
?????????????????????????????????????????????????????????????????????????????????????  
??????????????

;

END;

BEGIN ASSUMPTIONS;

USERTYPE SR487 STEPMATRIX = 10  
0 1 2 3 4 5 6 7 8 9

[0] . 2 2 2 2 2 2 2 1 1  
[1] 2 . 2 2 2 2 2 2 2  
[2] 2 2 . 1 2 1 2 1 2 2  
[3] 2 2 1 . 2 1 2 1 2 2  
[4] 2 2 2 2 . 2 2 2 2 2  
[5] 2 2 1 1 2 . 2 1 2 2  
[6] 2 2 2 2 2 2 . 2 2 2  
[7] 2 2 1 1 2 1 2 . 2 2  
[8] 1 2 2 2 2 2 2 2 . 1  
[9] 1 2 2 2 2 2 2 2 1 .

;

OPTIONS DEFTYPE=unord PolyTcount=MINSTEPS ;

CHARSET OSTEO = 1-361;

CHARSET MYOLINTEG = 362-381;

CHARSET INTEGUMENT = 382-570;

CHARSET FLTLESS = 139 162 170 209 522 536;

TYPESET \* STANDARD = unord: 1-92 97-101 104-109 111-113 115-119 121-124  
126 128-151 153-156 158-203 205-240 242-262 264-273 275-315 317-352 354 356-358  
360-392 394-518 520-532 534-535 537-568 570, ord: 93-96 102-103 110 114 120 125  
127 152 157 204 241 263 274 316 353 355 359 393 519 533 536 569;

TYPESET STANSTEP = unord: 1-92 97-101 104-109 111-113 115-119 121-124 126  
128-151 153-156 158-203 205-240 242-262 264-273 275-315 317-352 354 356-358 360-  
392 394-486 488-518 520-532 534-535 537-568 570, ord: 93-96 102-103 110 114 120  
125 127 152 157 204 241 263 274 316 353 355 359 393 519 533 536 569, SR487: 487;

EXSET \* INVARIANT = 3 5-6 11-15 20-22 26 29-30 34-36 38-42 45 48 50-57 61  
63 65-66 73-76 78 81 83-86 88 91 99-100 105-106 108-110 112-113 118-119 122-123  
126 128 131 133 136 142-144 149-151 161 163-166 175-177 180-182 186 188 192-193  
195 197 199-200 203 207-208 212-213 217 219-220 225-228 230-233 235 239-240 243  
245-247 250 255-256 265-266 268 270-271 277 279-282 285 292 295 297 299 302-303  
305 310 313-314 317 319-320 322-323 326 329-330 335 339-340 344 348-349 357 359  
362 368 375-376;

TAXSET POORFOSS = 18 151;

TAXSET MEDFOSS = 15 34-35 70-71 96 132-133 161;

TAXSET GOODFOS = 16 54 66 72 131 150 160;

TAXSET INCOMPL = 15-16 18 23 27-29 34-35 41 46 48 51 54-55 58 63 66-68 70-  
72 74 77-80 87-90 92 94 96 101 105 108 110 122-124 126 130-133 137-139 146-147  
150-151 160-161;

END;

BEGIN PAUP;

CONSTRAINT GRUOIDEA = ((2-8));

CONSTRAINT ARAMGRUI = ((3-8));

CONSTRAINT GRUINAE = ((5-8));

CONSTRAINT HELIRALL = ((9-143));

CONSTRAINT HELIORN = ((9-11));

CONSTRAINT RALLIDAE = ((12-143));

CONSTRAINT RALLINAE = ((13-143));

```
CONSTRAINT PORPHYR = ((13-18));
CONSTRAINT RALXPORP = ((19-143));
CONSTRAINT ARAMIDES = ((23-29));
CONSTRAINT PARDORTY = ((35, 37-38));
CONSTRAINT SAROTHR = ((63-80));
CONSTRAINT RALLSARO = ((68-80));
CONSTRAINT AMAURORN = ((121-125));
CONSTRAINT GALLINUL = ((126-143));
CONSTRAINT FULICA = ((136-143));
```

```
END;
```

```
BEGIN MACCLADE;
v 3.0
-1293940675
1000&/0
0
0
END;
```
